# Supplementary material
Source: PubMed Central journal article supplement (PMC3645912)
Supplement: NIHMS463507-supplement-supplement_1.pdf [file NIHMS463507-supplement-supplement_1.pdf]

**Supplemental Table 1:** Studies regarding molecules that play a role in eliciting expression of Indoleamine 2,3-dioxygenase (IDO) in Dendritic Cells (DCs).

|                               | DC cell type                                                                        | Additional information                                                                                                                                                                                                                                    | Reference(s)                                                                                                                    |
|-------------------------------|-------------------------------------------------------------------------------------|-----------------------------------------------------------------------------------------------------------------------------------------------------------------------------------------------------------------------------------------------------------|---------------------------------------------------------------------------------------------------------------------------------|
| <b>“Immunogenic” Agonists</b> |                                                                                     |                                                                                                                                                                                                                                                           |                                                                                                                                 |
| DC maturation                 | Human monocyte derived DC                                                           | Mature CD83+ DC express IDO                                                                                                                                                                                                                               | Chung et al., 2009                                                                                                              |
|                               | Human DCs – DC vaccination                                                          | Matured using cocktail of IL-1 $\beta$ , TNF $\alpha$ , IL-6, and Prostaglandin E2 (PGE2)                                                                                                                                                                 | Wobser et al., 2007                                                                                                             |
| TNF $\alpha$                  | Human monocyte derived DC                                                           | As an autocrine secondary signal to elicit IDO after <i>Chlamydia pneumoniae</i> infection in DC                                                                                                                                                          | Njau et al., 2009                                                                                                               |
| IFN $\alpha$                  | Plasmacytoid DC                                                                     | Failure to up-regulate IDO after topical PMA-elicited inflammation in IFN $\alpha$ R KO mice                                                                                                                                                              | Muller et al., 2008                                                                                                             |
| CpG                           | Splenic DC                                                                          | Dose-dependent. Also requires secondary signals.                                                                                                                                                                                                          | Baban et al., 2011                                                                                                              |
| IL-32                         | Human PBMC                                                                          | Implicated to elicit IDO during HIV infection                                                                                                                                                                                                             | Smith et al., 2011                                                                                                              |
| CD40L or LPS                  | Human CD11c+ DC<br>Human monocyte derived DC                                        | As a second stimulus for heightened IDO production.                                                                                                                                                                                                       | Hwu et al., 2000<br>Favre et al., 2010                                                                                          |
| CD80/CD86 ligation            | Splenic DC (total CD11c+)<br>Splenic DC (total CD11c+)                              | Failure for T-regs (via CTLA-4) to up-regulate IDO expression in B7-deficient DCs<br>Failure for CTLA-4-Ig to up-regulate IDO expression in B7-deficient DCs                                                                                              | Fallarino et al., 2003<br>Grohmann et al., 2003b                                                                                |
| CD28                          | Human monocyte derived DC                                                           | CD28 expression on malignant plasma cells                                                                                                                                                                                                                 | Nair et al., 2011                                                                                                               |
| 4-1BB                         | Lymph node CD11c+ DCs                                                               | Administration of agonist anti-4-1BB monoclonal antibody <i>in vivo</i> (IFN $\gamma$ signaling also required)                                                                                                                                            | Choi et al., 2011                                                                                                               |
| IFN $\gamma$                  | Tumor-draining lymph node CD11c+ DC<br>Human monocyte derived DC<br>Plasmacytoid DC | Lack of IDO-up-regulation after immunotherapy in IFN $\gamma$ -/- mice<br>IFN $\gamma$ plus 2 <sup>nd</sup> stimulus resulted in higher expression of IDO<br>Failure to up-regulate IDO after topical PMA-elicited inflammation in IFN $\gamma$ R KO mice | Harden et al., 2011<br>Gu et al., 2010<br>Hwu et al., 2000<br>Jurgens et al., 2009<br>Favre et al., 2010<br>Muller et al., 2008 |
| <b>Signaling Molecules</b>    |                                                                                     |                                                                                                                                                                                                                                                           |                                                                                                                                 |
| Foxo3                         | Plasmacytoid DCs                                                                    | Tumor associated DC                                                                                                                                                                                                                                       | Watkins et al., 2011                                                                                                            |
| Acetylated STAT-3             | BMDC                                                                                |                                                                                                                                                                                                                                                           | Sun et al., 2009                                                                                                                |
| GCN2                          | Plasmacytoid DC                                                                     |                                                                                                                                                                                                                                                           | Muller et al., 2008                                                                                                             |

Supplemental Table 1: (Continued).

|                                    |                                                    |                                                                                                                        |                                                    |
|------------------------------------|----------------------------------------------------|------------------------------------------------------------------------------------------------------------------------|----------------------------------------------------|
| Foxp3                              | Human monocyte derived DC                          | Failure to up-regulate IDO after topical PMA-elicited inflammation in GCN2-KO mice<br>Ectopic expression               | Lipscomb et al., 2010                              |
| AhR                                | BMDC                                               | Activation by environmental toxin, dioxin (TDCC)                                                                       | Mezrich et al., 2010<br>Simones and Shephard, 2011 |
|                                    | BMDC                                               | Activation by an endogenous ligand and tryptophan metabolite, kynurenine                                               | Nguyen et al., 2010                                |
| <b>"Tolerogenic" Agonists</b>      |                                                    |                                                                                                                        |                                                    |
| Human chorionic gonadotropin (hCG) | BMDC<br>Human monocyte derived DC                  | Only after a "first" IDO-eliciting signal (i.e. IFN-gamma)                                                             | Wan et al., 2008<br>Ochiel et al., 2010            |
| PD-1                               | Splenic CD19+ DC                                   | Lack of IDO induction after CpG if PD-1 interactions blocked <i>in vivo</i>                                            | Baban et al., 2011                                 |
| CTLA-4                             | CD8 $\alpha$ - splenic DC                          | CTLA-4 Ig                                                                                                              | Grohmann et al., 2003b                             |
|                                    | Splenic B220+ DC and splenic CD8 $\alpha$ + DCs    | Both CTLA-4 Ig and endogenous CTLA-4 expressed on T-regs                                                               | Mellor et al., 2004                                |
| TGF $\beta$                        | Both splenic CD8 $\alpha$ + and CD8 $\alpha$ - DCs | Require secondary cytokine production elicited from DC                                                                 | Fallarino et al., 2003                             |
|                                    | Plasmacytoid DCs                                   | TGF $\beta$ elicits long-term IDO expression. IDO functions as a signaling protein (independent of enzymatic activity) | Pallotta et al., 2011<br>Chen, 2011                |
|                                    | Splenic CD8 $\alpha$ + DC                          | Autocrine TGF $\beta$ sustains default IDO+ profile                                                                    | Belladonna et al., 2008, 2009                      |
|                                    | Splenic CD8 $\alpha$ -DC                           | Can switch CD8 $\alpha$ -immunogenic DC to tolerogenic IDO+ DC                                                         |                                                    |

IDO can be elicited by both immune "tolerogenic" agonists, as well as "immunogenic" agonists, as listed. Additionally, intracellular signaling molecules can also play a role in IDO expression in DCs. The IDO agonist is listed along with studies which demonstrated its ability to influence IDO expression in DCs. Additionally, the particular DC subset focused on in the study is noted. Unless indicated as "human", studies utilized murine DCs. BMDC = bone marrow derived dendritic cell.

underlying the sustained nature of IDO-mediated immune suppression are currently being elucidated, and several positive feedback loops have been identified.

Use of IDO inhibitors in the treatment of chronic infections or cancer may benefit patients by enhancing the intensity as well as the duration of cytotoxic
